# Supplementary material for: Increasing fire frequency and severity will increase habitat loss for a boreal forest indicator species
Source: PubMed Central journal article supplement — Ecol Appl. 2022 Mar 3;32(3):e2549. doi: 10.1002/eap.2549 (PMC9286541; doi:10.1002/eap.2549), 2022-03-03
Supplement: EAP-32-0-s001.pdf [file EAP-32-0-s001.pdf]

**Supporting Information.** Eric C. Palm, Michael J. Sutor, Kyle Joly, Jim D. Herriges, Allicia P. Kelly, Dave Hervieux, Kelsey L.M. Russell, Torsten W. Bentzen, Nicholas C. Larter, and Mark Hebblewhite. 2022. Increasing fire frequency and severity will increase habitat loss for a boreal forest indicator species. Ecological Applications.

## Appendix S1.

Table S1. Animal care permit details for captures of female caribou (*Rangifer tarandus*) in eastern Alaska and northwestern Canada.

| Region | Populations                                                                                        | Animal care permit #s                                                                                |
|--------|----------------------------------------------------------------------------------------------------|------------------------------------------------------------------------------------------------------|
| AB     | Richardson, Yates                                                                                  | University of Montana, IACUC # 05606MHECS_010207                                                     |
| AK     | Fortymile, Nelchina                                                                                | 2012-034, 2013-031, 2015-03, 2016-10                                                                 |
| NT     | Bistcho, Dehcho North, Dehcho South, Hay River Lowlands, Mackenzie, Pine Point-Buffalo Lake, Sahtu | Government of Northwest Territories Wildlife Act authority and internal permits and capture reviews. |
| YT     | Clear Creek, Klaza, Kluane, Tay River                                                              | Government of Yukon Territory wildlife act authority and internal permits and capture reviews.       |

Table S2. Summary of available GPS location data from female caribou (*Rangifer tarandus*) in eastern Alaska and northwestern Canada prior to filtering for all resource selection analyses.

| Ecotype   | Region | Population              | Years marked | # of animals | Mean # of years marked per animal | Mean # of locs per animal | Median relocation interval (hours) | Range of median relocation interval (hours) |
|-----------|--------|-------------------------|--------------|--------------|-----------------------------------|---------------------------|------------------------------------|---------------------------------------------|
| Boreal    | AB/NT  | Bistcho                 | 2006–2011    | 30           | 2.4                               | 2046                      | 8.0                                | 8–16                                        |
| Boreal    | NT     | Dehcho North            | 2007–2019    | 64           | 1.9                               | 1781                      | 8.0                                | 2–25                                        |
| Boreal    | NT     | Dehcho South            | 2007–2019    | 66           | 2.0                               | 1699                      | 8.0                                | 4–24                                        |
| Boreal    | NT     | Hay River Lowlands      | 2008–2019    | 86           | 2.1                               | 1946                      | 8.0                                | 2–24                                        |
| Boreal    | NT     | Mackenzie               | 2015–2019    | 37           | 2.2                               | 5371                      | 2.0                                | 2–8                                         |
| Boreal    | NT     | Pine Butte-Buffalo Lake | 2015–2019    | 44           | 2.0                               | 2241                      | 8.0                                | 2–8                                         |
| Boreal    | AB     | Richardson              | 2008–2016    | 36           | 1.4                               | 4632                      | 2.0                                | 2–23                                        |
| Boreal    | NT     | Sahtu                   | 2003–2011    | 16           | 2.6                               | 1441                      | 12.0                               | 8–24                                        |
| Boreal    | AB     | Yates                   | 2014–2016    | 13           | 1.1                               | 4674                      | 2.0                                | 2–23                                        |
| Migratory | AK/YT  | Fortymile               | 2013–2019    | 118          | 2.2                               | 4357                      | 2.5                                | 1–26                                        |
| Migratory | AK/YT  | Nelchina                | 2012–2015    | 78           | 1.3                               | 1707                      | 4.0                                | 4–12                                        |
| Mountain  | YT     | Clear Creek             | 2017–2019    | 39           | 1.5                               | 305                       | 23.0                               | 13–69                                       |
| Mountain  | YT     | Klaza                   | 2012–2019    | 43           | 1.6                               | 1742                      | 8.0                                | 5–13                                        |
| Mountain  | YT     | Kluane                  | 2014–2018    | 12           | 2.6                               | 3875                      | 5.0                                | 5–13                                        |
| Mountain  | YT     | Tay River               | 2016–2018    | 39           | 1.9                               | 550                       | 23.0                               | 23–46                                       |

Table S3. Summary of GPS location data from adult female caribou (*Rangifer tarandus*) in eastern Alaska and northwestern Canada used in resource selection analyses. We excluded the Nelchina population from the *within-burn RSA* summer model due to a lack of GPS locations within burns.

A. *Burn perimeter and burn severity RSAs*

| Ecotype   | Region | Population            | Years marked | Summer        |                           |                |                           | Winter        |                           |                |                           |
|-----------|--------|-----------------------|--------------|---------------|---------------------------|----------------|---------------------------|---------------|---------------------------|----------------|---------------------------|
|           |        |                       |              | 24-hour scale |                           | Two-week scale |                           | 24-hour scale |                           | Two-week scale |                           |
|           |        |                       |              | # of animals  | Mean # of locs per animal | # of animals   | Mean # of locs per animal | # of animals  | Mean # of locs per animal | # of animals   | Mean # of locs per animal |
| Boreal    | AB/NT  | Bistcho               | 2006–2011    | 29            | 264.4                     | 28             | 20.8                      | 30            | 498.8                     | 28             | 38.7                      |
| Boreal    | NT     | Dehcho North          | 2007–2019    | 49            | 221.3                     | 44             | 18.0                      | 58            | 385.9                     | 46             | 33.5                      |
| Boreal    | NT     | Dehcho South          | 2007–2019    | 56            | 181.0                     | 50             | 15.8                      | 65            | 376.2                     | 52             | 32.8                      |
| Boreal    | NT     | Hay River Lowlands    | 2008–2019    | 71            | 195.2                     | 61             | 16.9                      | 85            | 381.8                     | 67             | 34.3                      |
| Boreal    | NT     | Mackenzie             | 2015–2019    | 30            | 315.4                     | 30             | 19.3                      | 37            | 523.6                     | 32             | 38.8                      |
| Boreal    | NT     | Pine Point-Buffalo L. | 2015–2019    | 34            | 262.5                     | 33             | 18.5                      | 44            | 460.7                     | 35             | 39.0                      |
| Boreal    | AB     | Richardson            | 2008–2016    | 30            | 255.8                     | 26             | 16.0                      | 36            | 386.6                     | 27             | 27.5                      |
| Boreal    | NT     | Sahtu                 | 2006–2011    | 14            | 278.3                     | 13             | 23.5                      | 15            | 392.3                     | 14             | 30.5                      |
| Boreal    | AB     | Yates                 | 2014–2016    | 8             | 258.4                     | 8              | 14.6                      | 8             | 496.8                     | 8              | 28.2                      |
| Migratory | AK/YT  | Fortymile             | 2013–2019    | 110           | 342.4                     | 102            | 22.0                      | 112           | 513.2                     | 102            | 36.5                      |
| Migratory | AK/YT  | Nelchina              | 2012–2015    | 64            | 173.6                     | 55             | 13.7                      | 77            | 232.6                     | 38             | 27.4                      |
| Mountain  | YT     | Clear Creek           | 2017–2019    | 20            | 114.3                     | 16             | 11.5                      | 22            | 160.4                     | 19             | 18.1                      |
| Mountain  | YT     | Klaza                 | 2012–2019    | 33            | 173.9                     | 32             | 13.1                      | 43            | 345.7                     | 41             | 26.2                      |
| Mountain  | YT     | Kluane                | 2014–2018    | 10            | 418.9                     | 11             | 22.9                      | 12            | 601.6                     | 27             | 36.1                      |
| Mountain  | YT     | Tay River             | 2016–2018    | 32            | 180.7                     | 8              | 16.0                      | 36            | 265.6                     | 29             | 24.8                      |

B. *Within-burn RSA*

| Ecotype   | Region | Population | Years marked | Summer       |                                |                                    |                                               | Winter       |                                |                                    |                                               |
|-----------|--------|------------|--------------|--------------|--------------------------------|------------------------------------|-----------------------------------------------|--------------|--------------------------------|------------------------------------|-----------------------------------------------|
|           |        |            |              | # of animals | Mean # of locations per animal | Mean # of burns visited per animal | Median location interval within burns (hours) | # of animals | Mean # of locations per animal | Mean # of burns visited per animal | Median location interval within burns (hours) |
| Migratory | AK/YT  | Fortymile  | 2013–2019    | 91           | 76.8                           | 13.3                               | 9.9                                           | 94           | 106.0                          | 18.8                               | 12.0                                          |
| Migratory | AK/YT  | Nelchina   | 2012–2015    |              |                                |                                    |                                               | 30           | 47.1                           | 5.5                                | 12.6                                          |

|          |    |        |           |    |      |     |      |    |      |     |      |
|----------|----|--------|-----------|----|------|-----|------|----|------|-----|------|
| Mountain | YT | Klaza  | 2012–2019 | 12 | 52.6 | 1.5 | 12.7 | 7  | 50.3 | 3.3 | 8.0  |
| Mountain | YT | Kluane | 2014–2017 | 4  | 74.8 | 1.5 | 15.1 | 17 | 153  | 1.6 | 16.5 |

---

Table S4. Fixed effect coefficients and 95% confidence intervals for covariates in resource selection analyses for female caribou (*Rangifer tarandus*) in eastern Alaska and northwest Canada. TPI indicates terrain position index. TRI indicates terrain ruggedness index

A. *Burn perimeter RSA* ( $n = 15$  populations). Land cover coefficients (including burn) indicate selection relative to the reference category of evergreen forest and are from models without functional responses.

| Covariate               | Summer         |       |       |               |       |       | Winter         |       |       |               |       |       |
|-------------------------|----------------|-------|-------|---------------|-------|-------|----------------|-------|-------|---------------|-------|-------|
|                         | Two-week scale |       |       | 24-hour scale |       |       | Two-week scale |       |       | 24-hour scale |       |       |
|                         | $\beta$        | LCI   | UCI   | $B$           | LCI   | UCI   | $\beta$        | LCI   | UCI   | $\beta$       | LCI   | UCI   |
| burn                    | -0.66          | -1.04 | -0.29 | -0.31         | -0.47 | -0.15 | -0.99          | -1.16 | -0.82 | -0.61         | -0.68 | -0.53 |
| fen                     | -0.52          | -0.77 | -0.26 | -0.46         | -0.65 | -0.27 | -0.63          | -0.98 | -0.28 | -0.45         | -0.68 | -0.22 |
| grass                   | 0.24           | -0.08 | 0.56  | -0.19         | -0.60 | 0.22  | -0.20          | -0.59 | 0.19  | -0.26         | -0.58 | 0.06  |
| other                   | -0.40          | -0.67 | -0.13 | -0.48         | -0.61 | -0.34 | -0.71          | -0.98 | -0.45 | -0.54         | -0.70 | -0.39 |
| shrubs                  | -0.60          | -0.98 | -0.21 | -0.59         | -0.87 | -0.31 | -0.98          | -1.39 | -0.56 | -0.59         | -0.85 | -0.33 |
| sparse                  | 0.26           | 0.15  | 0.37  | 0.16          | 0.13  | 0.19  | -0.13          | -0.22 | -0.04 | 0.05          | 0.02  | 0.08  |
| water                   | -5.02          | -6.73 | -3.31 | -4.21         | -4.99 | -3.44 | -3.26          | -3.80 | -2.72 | -2.40         | -2.75 | -2.04 |
| tree cover              | -0.41          | -0.63 | -0.19 | -0.27         | -0.48 | 0.07  | -0.60          | -0.71 | -0.49 | -0.36         | -0.45 | -0.28 |
| tree cover <sup>2</sup> |                |       |       |               |       |       | -0.36          | -0.39 | -0.33 | -0.23         | -0.23 | -0.22 |
| TRI                     | -0.82          | -0.63 | -0.28 | -0.55         | -0.90 | -0.20 | -0.73          | -1.20 | -0.26 | -0.34         | -0.53 | -0.15 |
| TRI <sup>2</sup>        |                |       |       |               |       |       | -0.10          | -0.12 | 0.08  | -0.04         | -0.04 | -0.03 |
| TPI                     | 0.07           | 0.05  | 0.10  | 0.05          | 0.05  | 0.06  | 0.09           | 0.08  | 0.11  | 0.08          | 0.08  | 0.09  |
| log sl                  | 0.12           | 0.09  | 0.16  | 0.05          | 0.05  | 0.06  | 0.12           | 0.10  | 0.14  | 0.06          | 0.06  | 0.06  |

B. *Burn severity RSA* at the 24-hour spatiotemporal scale ( $n = 15$  populations). Land cover coefficients indicate selection relative to the reference category of unburned evergreen forest.

| Covariate         | Summer  |       |       | Winter  |       |       |
|-------------------|---------|-------|-------|---------|-------|-------|
|                   | $\beta$ | LCI   | UCI   | $\beta$ | LCI   | UCI   |
| old burn          | -0.45   | -0.63 | -0.28 | -0.53   | -0.66 | -0.40 |
| regrowth          | -0.66   | -0.96 | -0.36 | -0.50   | -0.80 | -0.20 |
| unburned residual | -0.16   | -0.29 | -0.03 | -0.07   | -0.22 | 0.08  |
| low severity      | -0.26   | -0.37 | -0.15 | -0.46   | -0.59 | -0.33 |
| high severity     | -0.50   | -0.62 | -0.37 | -1.07   | -1.23 | -0.90 |
| fen               | -0.47   | -0.65 | -0.28 | -0.46   | -0.69 | -0.23 |
| grass             | -0.22   | -0.65 | 0.22  | -0.27   | -0.58 | 0.05  |
| other             | -0.47   | -0.62 | -0.33 | -0.53   | -0.68 | -0.38 |

|                         |       |       |       |       |       |       |
|-------------------------|-------|-------|-------|-------|-------|-------|
| shrubs                  | -0.60 | -0.88 | -0.32 | -0.58 | -0.83 | -0.32 |
| sparse                  | 0.16  | 0.13  | 0.19  | 0.06  | 0.04  | 0.08  |
| water                   | -4.21 | -4.98 | -3.44 | -2.39 | -2.73 | -2.06 |
| tree cover              | -0.27 | -0.47 | -0.07 | -0.35 | -0.45 | -0.24 |
| tree cover <sup>2</sup> |       |       |       | -0.23 | -0.24 | -0.22 |
| TRI                     | -0.54 | -0.91 | -0.17 | -0.33 | -0.53 | -0.13 |
| TRI <sup>2</sup>        |       |       |       | -0.04 | -0.04 | -0.03 |
| TPI                     | 0.05  | 0.05  | 0.06  | 0.08  | 0.08  | 0.09  |
| log sl                  | 0.06  | 0.06  | 0.07  | 0.07  | 0.07  | 0.07  |

C. *Within-burn RSA* ( $n = 4$  populations). Land cover categories represent pre-fire land cover, and their coefficients indicate selection relative to the reference pre-fire land cover category of evergreen forest.

| Covariate                              | Summer (~10-hour scale) |       |       | Winter (~12-hour scale) |       |       |
|----------------------------------------|-------------------------|-------|-------|-------------------------|-------|-------|
|                                        | $\beta$                 | LCI   | UCI   | $\beta$                 | LCI   | UCI   |
| severity                               | -0.05                   | -0.11 | 0.02  | -0.22                   | -0.28 | -0.17 |
| lichen                                 | 0.35                    | 0.27  | 0.43  | 0.40                    | 0.33  | 0.47  |
| lichen <sup>2</sup>                    | -0.03                   | -0.06 | -0.00 | -0.04                   | -0.06 | -0.02 |
| distance within perimeter              | -0.58                   | -0.69 | -0.47 | -0.40                   | -0.49 | -0.32 |
| distance within perimeter <sup>2</sup> | 0.06                    | 0.03  | 0.09  | 0.04                    | 0.01  | 0.06  |
| severity:tsf                           | 0.04                    | -0.03 | 0.10  | 0.09                    | 0.04  | 0.14  |
| fen                                    | 0.57                    | 0.38  | 0.76  | 0.02                    | -0.18 | 0.21  |
| grass                                  | 0.86                    | 0.67  | 1.04  | 0.39                    | 0.22  | 0.57  |
| other                                  | -0.04                   | -0.54 | 0.46  | -0.35                   | -0.71 | 0.01  |
| shrubs                                 | 0.43                    | 0.28  | 0.58  | -0.20                   | -0.35 | -0.06 |
| sparse                                 | 0.54                    | 0.31  | 0.76  | 0.07                    | -0.11 | 0.25  |
| TRI                                    | -0.10                   | -0.18 | -0.03 | -0.04                   | -0.10 | 0.02  |
| TRI <sup>2</sup>                       | -0.14                   | -0.19 | -0.09 | -0.07                   | -0.11 | -0.04 |
| TPI                                    | 0.08                    | 0.03  | 0.14  | 0.03                    | -0.01 | 0.07  |

Table S5. Population-level random selection coefficients and their 95% confidence intervals (calculated using the sum of conditional and fixed effects variances) for burns (in the *burn perimeter RSA*) at two spatiotemporal scales and seasons, for female caribou (*Rangifer tarandus*) across 15 populations in western Canada and eastern Alaska. Values indicate log odds of selection relative to the reference land cover category of unburned evergreen forest and are from models without functional responses.

| Ecotype   | Population              | Summer         |       |       |               |       |       | Winter         |       |       |               |       |       |
|-----------|-------------------------|----------------|-------|-------|---------------|-------|-------|----------------|-------|-------|---------------|-------|-------|
|           |                         | Two-week scale |       |       | 24-hour scale |       |       | Two-week scale |       |       | 24-hour scale |       |       |
|           |                         | $\beta$        | LCI   | UCI   | $\beta$       | LCI   | UCI   | $\beta$        | LCI   | UCI   | $\beta$       | LCI   | UCI   |
| Boreal    | Bistcho                 | -0.55          | -1.47 | 0.36  | -0.47         | -0.91 | -0.03 | -0.78          | -1.23 | -0.32 | -0.39         | -0.60 | -0.17 |
| Boreal    | Dehcho North            | -0.46          | -1.30 | 0.36  | -0.37         | -0.76 | 0.01  | -1.33          | -1.75 | -0.91 | -0.72         | -0.91 | -0.54 |
| Boreal    | Dehcho South            | -1.08          | -2.09 | -0.08 | -0.61         | -1.09 | -0.13 | -1.03          | -1.53 | -0.52 | -0.55         | -0.76 | -0.34 |
| Boreal    | Hay River Lowlands      | -0.41          | -1.24 | 0.41  | -0.32         | -0.70 | 0.05  | -0.84          | -1.23 | -0.44 | -0.52         | -0.69 | -0.34 |
| Boreal    | Mackenzie               | 0.56           | -0.55 | 1.67  | 0.13          | -0.36 | 0.62  | -0.45          | -0.91 | 0.00  | -0.47         | -0.68 | -0.25 |
| Boreal    | Pine Point-Buffalo Lake | -0.45          | -1.32 | 0.41  | -0.23         | -0.65 | 0.18  | -0.73          | -1.14 | -0.32 | -0.63         | -0.82 | -0.44 |
| Boreal    | Richardson              | -0.53          | -1.43 | 0.36  | -0.22         | -0.64 | 0.19  | -1.29          | -1.74 | -0.84 | -0.79         | -0.99 | -0.59 |
| Boreal    | Sahtu                   | -0.31          | -1.27 | 0.64  | -0.17         | -0.65 | 0.30  | -0.85          | -1.37 | -0.34 | -0.54         | -0.78 | -0.31 |
| Boreal    | Yates                   | 0.01           | -1.11 | 1.15  | 0.02          | -0.53 | 0.59  | -0.84          | -1.39 | -0.30 | -0.58         | -0.82 | -0.34 |
| Migratory | Fortymile               | -0.85          | -1.64 | -0.06 | -0.28         | -0.64 | 0.06  | -1.17          | -1.56 | -0.79 | -0.74         | -0.91 | -0.57 |
| Migratory | Nelchina                | -0.76          | -1.98 | 0.46  | -0.12         | -0.65 | 0.39  | -1.03          | -1.49 | -0.56 | -0.61         | -0.82 | -0.41 |
| Mountain  | Clear Creek             | -1.38          | -2.89 | 0.11  | -0.36         | -0.91 | 0.17  | -0.74          | -1.29 | -0.19 | -0.59         | -0.83 | -0.35 |
| Mountain  | Klaza                   | -0.64          | -1.63 | 0.35  | -0.45         | -0.90 | 0.00  | -1.18          | -1.65 | -0.70 | -0.66         | -0.86 | -0.45 |
| Mountain  | Kluane                  | -0.72          | -1.89 | 0.44  | -0.22         | -0.77 | 0.33  | -0.89          | -1.47 | -0.31 | -0.54         | -0.79 | -0.28 |
| Mountain  | Tay River               | -1.77          | -3.07 | -0.47 | -0.76         | -1.31 | -0.21 | -1.36          | -1.85 | -0.86 | -0.62         | -0.83 | -0.41 |

Table S6. Delta AIC values for candidate models testing for functional responses to burns and those testing for the effect of ecotype on relative selection for burns for female caribou (*Rangifer tarandus*) across 15 populations in western Canada and eastern Alaska in the *burn perimeter RSA*. Bolded values indicate top models for each combination of spatiotemporal scale and season. df indicates degrees of freedom.

| Model                                 | df | Two-week scale |            | 24-hour scale |            |
|---------------------------------------|----|----------------|------------|---------------|------------|
|                                       |    | Summer         | Winter     | Summer        | Winter     |
| First order functional response       | 33 | <b>0.0</b>     | 9.0        | <b>0.0</b>    | 7.1        |
| Second order functional response      | 34 | 1.1            | <b>0.0</b> | 1.6           | <b>0.0</b> |
| Burn:ecotype interaction              | 34 | 74.0           | 49.6       | 109.9         | 29.6       |
| No functional response or interaction | 32 | 78.6           | 47.4       | 109.4         | 27.2       |

Table S7. Population-level random selection coefficients and their 95% confidence intervals (calculated using the sum of conditional and fixed effects variances) for burn severity levels (in the *burn severity RSA*) at the 24-hour spatiotemporal scale during summer and winter for female caribou (*Rangifer tarandus*) across 15 populations in western Canada and eastern Alaska. Values indicate log odds of selection relative to the reference land cover category of unburned evergreen forest.

A. Summer

| Ecotype   | Population            | Old burn |       |       | Regrowth |       |       | Residual |       |      | Low severity |       |       | High severity |       |       |
|-----------|-----------------------|----------|-------|-------|----------|-------|-------|----------|-------|------|--------------|-------|-------|---------------|-------|-------|
|           |                       | $\beta$  | LCI   | UCI   | $\beta$  | LCI   | UCI   | $\beta$  | LCI   | UCI  | $\beta$      | LCI   | UCI   | $\beta$       | LCI   | UCI   |
| Boreal    | Bistcho               | -0.45    | -0.99 | 0.08  | -0.78    | -1.59 | 0.01  | -0.16    | -0.52 | 0.19 | -0.38        | -0.70 | -0.07 | -0.52         | -0.86 | -0.18 |
| Boreal    | Dehcho North          | -0.47    | -0.90 | -0.04 | -0.61    | -1.28 | 0.05  | -0.32    | -0.67 | 0.02 | -0.12        | -0.40 | 0.16  | -0.53         | -0.84 | -0.21 |
| Boreal    | Dehcho South          | -0.70    | -1.28 | -0.13 | -0.60    | -1.35 | 0.14  | -0.13    | -0.51 | 0.24 | -0.37        | -0.71 | -0.03 | -0.49         | -0.85 | -0.13 |
| Boreal    | Hay River Lowlands    | -0.43    | -0.84 | -0.03 | -0.60    | -1.32 | 0.11  | -0.08    | -0.42 | 0.25 | -0.21        | -0.52 | 0.08  | -0.42         | -0.77 | -0.07 |
| Boreal    | Mackenzie             | -0.45    | -1.02 | 0.12  | -0.50    | -1.30 | 0.30  | -0.01    | -0.38 | 0.35 | 0.00         | -0.36 | 0.35  | -0.49         | -0.84 | -0.15 |
| Boreal    | Pine Point-Buffalo L. | -0.29    | -0.72 | 0.14  | -0.78    | -1.46 | -0.09 | -0.34    | -0.72 | 0.03 | -0.26        | -0.56 | 0.04  | -0.65         | -1.02 | -0.29 |
| Boreal    | Richardson            | -0.22    | -0.65 | 0.21  | -0.66    | -1.33 | 0.00  | -0.16    | -0.50 | 0.17 | -0.27        | -0.56 | 0.01  | -0.69         | -1.06 | -0.33 |
| Boreal    | Sahtu                 | -0.34    | -0.86 | 0.18  | -0.65    | -1.37 | 0.05  | -0.17    | -0.56 | 0.20 | -0.20        | -0.55 | 0.15  | -0.38         | -0.78 | 0.01  |
| Boreal    | Yates                 | -0.07    | -0.70 | 0.55  | -0.65    | -1.40 | 0.08  | -0.17    | -0.59 | 0.25 | -0.28        | -0.67 | 0.10  | -0.40         | -0.85 | 0.04  |
| Migratory | Fortymile             | -0.69    | -1.10 | -0.29 | -0.27    | -1.18 | 0.64  | 0.05     | -0.25 | 0.35 | -0.31        | -0.57 | -0.04 | -0.28         | -0.56 | 0.00  |
| Migratory | Nelchina              | -0.50    | -1.13 | 0.12  | -0.65    | -1.40 | 0.08  | -0.16    | -0.57 | 0.24 | -0.28        | -0.66 | 0.10  | -0.41         | -0.84 | 0.02  |
| Mountain  | Clear Creek           | -0.43    | -1.04 | 0.18  | -0.68    | -1.42 | 0.06  | -0.08    | -0.51 | 0.35 | -0.22        | -0.61 | 0.16  | -0.50         | -0.91 | -0.09 |
| Mountain  | Klaza                 | -0.45    | -1.00 | 0.08  | -0.70    | -1.46 | 0.04  | -0.15    | -0.54 | 0.23 | -0.28        | -0.63 | 0.05  | -0.41         | -0.78 | -0.04 |
| Mountain  | Kluane                | -0.47    | -1.09 | 0.13  | -0.66    | -1.40 | 0.08  | -0.11    | -0.53 | 0.30 | -0.20        | -0.58 | 0.18  | -0.47         | -0.87 | -0.06 |
| Mountain  | Tay River             | -0.54    | -1.13 | 0.04  | -0.64    | -1.38 | 0.09  | -0.14    | -0.56 | 0.27 | -0.35        | -0.74 | 0.04  | -0.61         | -1.06 | -0.17 |

B. Winter

| Ecotype | Population            | Old burn |       |       | Regrowth |       |       | Unburned residual |       |       | Low severity |       |       | High severity |       |       |
|---------|-----------------------|----------|-------|-------|----------|-------|-------|-------------------|-------|-------|--------------|-------|-------|---------------|-------|-------|
|         |                       | $B$      | LCI   | UCI   | $\beta$  | LCI   | UCI   | $\beta$           | LCI   | UCI   | $\beta$      | LCI   | UCI   | $\beta$       | LCI   | UCI   |
| Boreal  | Bistcho               | -0.34    | -0.71 | 0.02  | -0.29    | -1.06 | 0.46  | 0.24              | -0.11 | 0.60  | -0.19        | -0.49 | 0.11  | -0.49         | -0.90 | -0.07 |
| Boreal  | Dehcho North          | -0.72    | -1.04 | -0.41 | -0.35    | -1.04 | 0.33  | -0.27             | -0.61 | 0.07  | -0.43        | -0.72 | -0.14 | -1.12         | -1.50 | -0.73 |
| Boreal  | Dehcho South          | -0.54    | -0.91 | -0.16 | 0.12     | -0.83 | 1.07  | 0.03              | -0.36 | 0.42  | -0.27        | -0.59 | 0.04  | -0.55         | -0.99 | -0.12 |
| Boreal  | Hay River Lowlands    | -0.57    | -0.86 | -0.29 | -1.23    | -2.06 | -0.40 | -0.14             | -0.48 | 0.20  | -0.46        | -0.77 | -0.16 | -0.92         | -1.33 | -0.52 |
| Boreal  | Mackenzie             | -0.92    | -1.42 | -0.42 | -0.59    | -1.33 | 0.15  | 0.12              | -0.23 | 0.47  | -0.08        | -0.39 | 0.23  | -1.14         | -1.54 | -0.73 |
| Boreal  | Pine Point-Buffalo L. | -0.48    | -0.78 | -0.18 | -0.90    | -1.60 | -0.20 | -0.53             | -0.90 | -0.17 | -0.62        | -0.94 | -0.31 | -1.10         | -1.52 | -0.69 |
| Boreal  | Richardson            | -0.53    | -0.84 | -0.22 | -0.38    | -1.09 | 0.33  | -0.31             | -0.67 | 0.05  | -0.88        | -1.19 | -0.57 | -1.50         | -1.92 | -1.09 |
| Boreal  | Sahtu                 | -0.49    | -0.88 | -0.10 | -0.15    | -0.96 | 0.66  | 0.18              | -0.24 | 0.61  | -0.55        | -0.93 | -0.16 | -1.14         | -1.64 | -0.64 |



|           |             |       |       |       |       |       |       |       |       |      |       |       |       |       |       |       |
|-----------|-------------|-------|-------|-------|-------|-------|-------|-------|-------|------|-------|-------|-------|-------|-------|-------|
| Boreal    | Yates       | -0.58 | -0.97 | -0.19 | -0.49 | -1.64 | 0.65  | 0.13  | -0.44 | 0.71 | -0.48 | -0.93 | -0.02 | -1.06 | -1.66 | -0.45 |
| Migratory | Fortymile   | -0.55 | -0.84 | -0.26 | -0.83 | -1.56 | -0.10 | -0.17 | -0.49 | 0.15 | -0.68 | -0.96 | -0.39 | -1.14 | -1.50 | -0.78 |
| Migratory | Nelchina    | -0.41 | -0.75 | -0.08 | -0.43 | -1.27 | 0.40  | -0.38 | -0.78 | 0.01 | -0.53 | -0.87 | -0.19 | -0.86 | -1.28 | -0.44 |
| Mountain  | Clear Creek | -0.23 | -0.75 | 0.28  | -0.30 | -1.22 | 0.61  | 0.05  | -0.42 | 0.53 | -0.54 | -0.98 | -0.09 | -1.34 | -1.89 | -0.80 |
| Mountain  | Klaza       | -0.65 | -1.01 | -0.29 | -0.04 | -0.98 | 0.89  | 0.17  | -0.21 | 0.57 | -0.52 | -0.86 | -0.18 | -1.05 | -1.48 | -0.63 |
| Mountain  | Kluane      | -0.22 | -0.77 | 0.33  | -0.50 | -1.65 | 0.64  | 0.06  | -0.47 | 0.59 | -0.15 | -0.57 | 0.25  | -1.03 | -1.54 | -0.52 |
| Mountain  | Tay River   | -0.48 | -0.84 | -0.12 | -0.30 | -1.36 | 0.75  | 0.05  | -0.39 | 0.50 | -0.31 | -0.67 | 0.04  | -1.07 | -1.51 | -0.62 |

---

Table S8. Spearman rank correlations for resource selection models for female caribou (*Rangifer tarandus*) in western Canada and eastern Alaska. For the *burn perimeter* and *burn severity RSAs*, models were fit using 14 of 15 populations, and model coefficients were used to predict RSF scores for the withheld population. Values for *burn perimeter RSA* are from top models with functional responses. For the *within-burn RSA*, models were fit to 90% of individual caribou, and model coefficients were used to predict RSF scores for the remaining 10% of animals.

| Ecotype   | Population              | <i>Burn perimeter RSA</i> |          |           |          | <i>Burn severity RSA</i> |          | Random fold | <i>Within-burn RSA</i> |             |
|-----------|-------------------------|---------------------------|----------|-----------|----------|--------------------------|----------|-------------|------------------------|-------------|
|           |                         | Summer                    |          | Winter    |          | Summer                   | Winter   |             | Summer                 | Winter      |
|           |                         | Two weeks                 | 24 hours | Two weeks | 24 hours | 24 hours                 | 24 hours |             | 10–15 hours            | 12–17 hours |
| Boreal    | Bistcho                 | 0.88                      | 0.96     | 1.00      | 1.00     | 0.94                     | 1.00     | 1           | 0.70                   | 0.99        |
| Boreal    | Dehcho North            | 0.94                      | 0.89     | 1.00      | 1.00     | 0.99                     | 1.00     | 2           | 0.84                   | 0.83        |
| Boreal    | Dehcho South            | 0.92                      | 0.94     | 1.00      | 1.00     | 0.97                     | 1.00     | 3           | 0.81                   | 0.87        |
| Boreal    | Hay River Lowlands      | 0.63                      | 0.02     | 1.00      | 0.99     | 0.13                     | 1.00     | 4           | 0.71                   | 0.83        |
| Boreal    | Mackenzie               | 0.77                      | 0.47     | 0.78      | 0.34     | 0.84                     | 0.88     | 5           | 0.53                   | 0.87        |
| Boreal    | Pine Point-Buffalo Lake | 0.79                      | 0.55     | 0.99      | 1.00     | 0.76                     | 1.00     | 6           | 0.81                   | 0.79        |
| Boreal    | Richardson              | 0.92                      | 0.92     | 0.96      | 1.00     | 0.98                     | 0.99     | 7           | 0.77                   | 0.77        |
| Boreal    | Sahtu Boreal            | 0.72                      | 0.74     | 0.96      | 0.99     | 0.83                     | 0.99     | 8           | 0.96                   | 0.85        |
| Boreal    | Yates                   | 0.63                      | 0.49     | 0.99      | 0.99     | 0.04                     | 1.00     | 9           | 0.70                   | 0.54        |
| Migratory | Fortymile               | 0.95                      | 0.99     | 0.99      | 1.00     | 1.00                     | 1.00     | 10          | 0.90                   | 0.84        |
| Migratory | Nelchina                | 1.00                      | 1.00     | 0.98      | 1.00     | 1.00                     | 1.00     |             |                        |             |
| Mountain  | Clear Creek             | -0.19                     | 0.92     | 0.88      | 0.82     | 0.87                     | 0.86     |             |                        |             |
| Mountain  | Klaza                   | 0.92                      | 0.92     | 0.96      | 0.98     | 0.96                     | 0.96     |             |                        |             |
| Mountain  | Kluane                  | 0.86                      | 0.98     | 0.87      | 0.96     | 0.98                     | 0.95     |             |                        |             |
| Mountain  | Tay River               | 0.78                      | 0.99     | 0.96      | 1.00     | 1.00                     | 1.00     |             |                        |             |

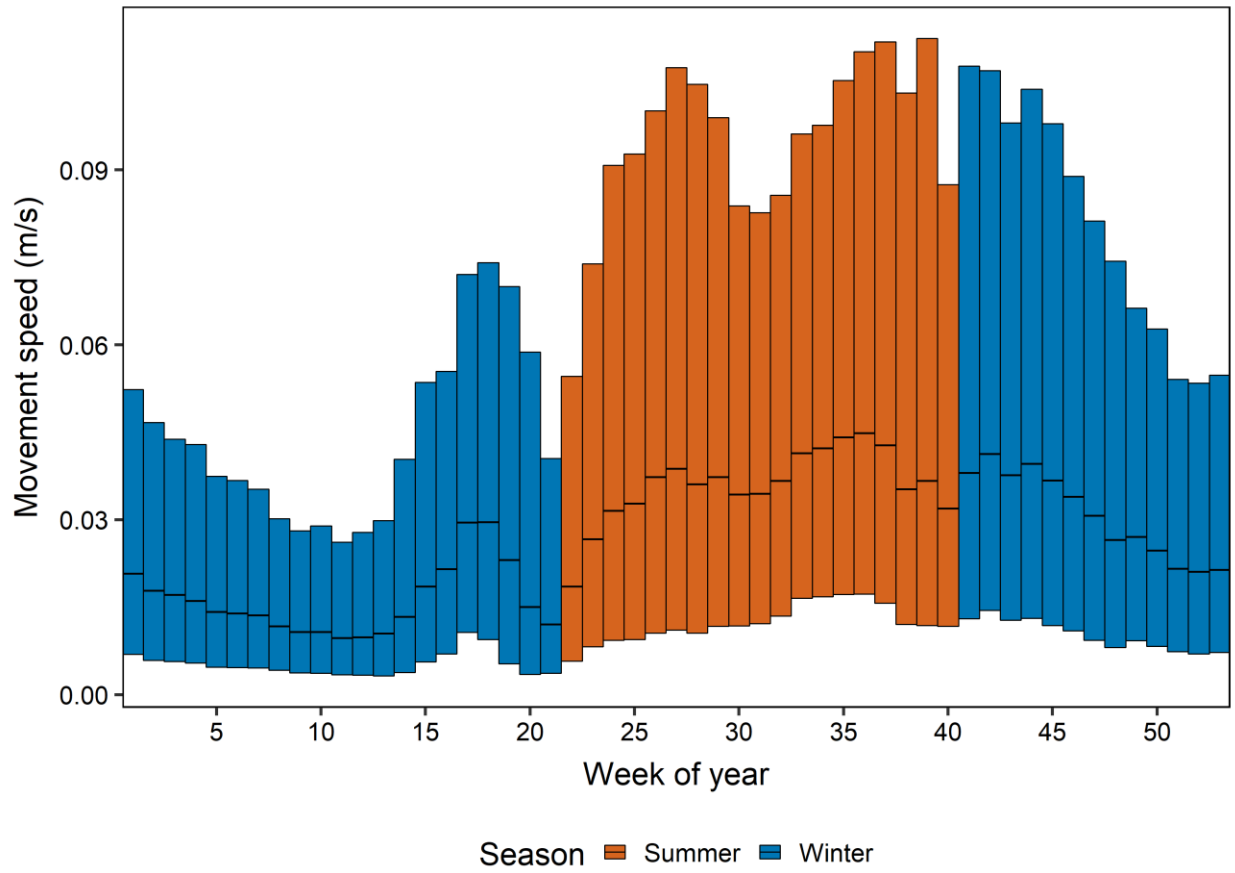

Fig. S1. Movement speeds by week of year across all 15 populations of caribou included in the *burn perimeter* and *burn severity RSAs*. Black horizontal bars indicate median values and colored bars represent values between 0.25 and 0.75 quantiles.

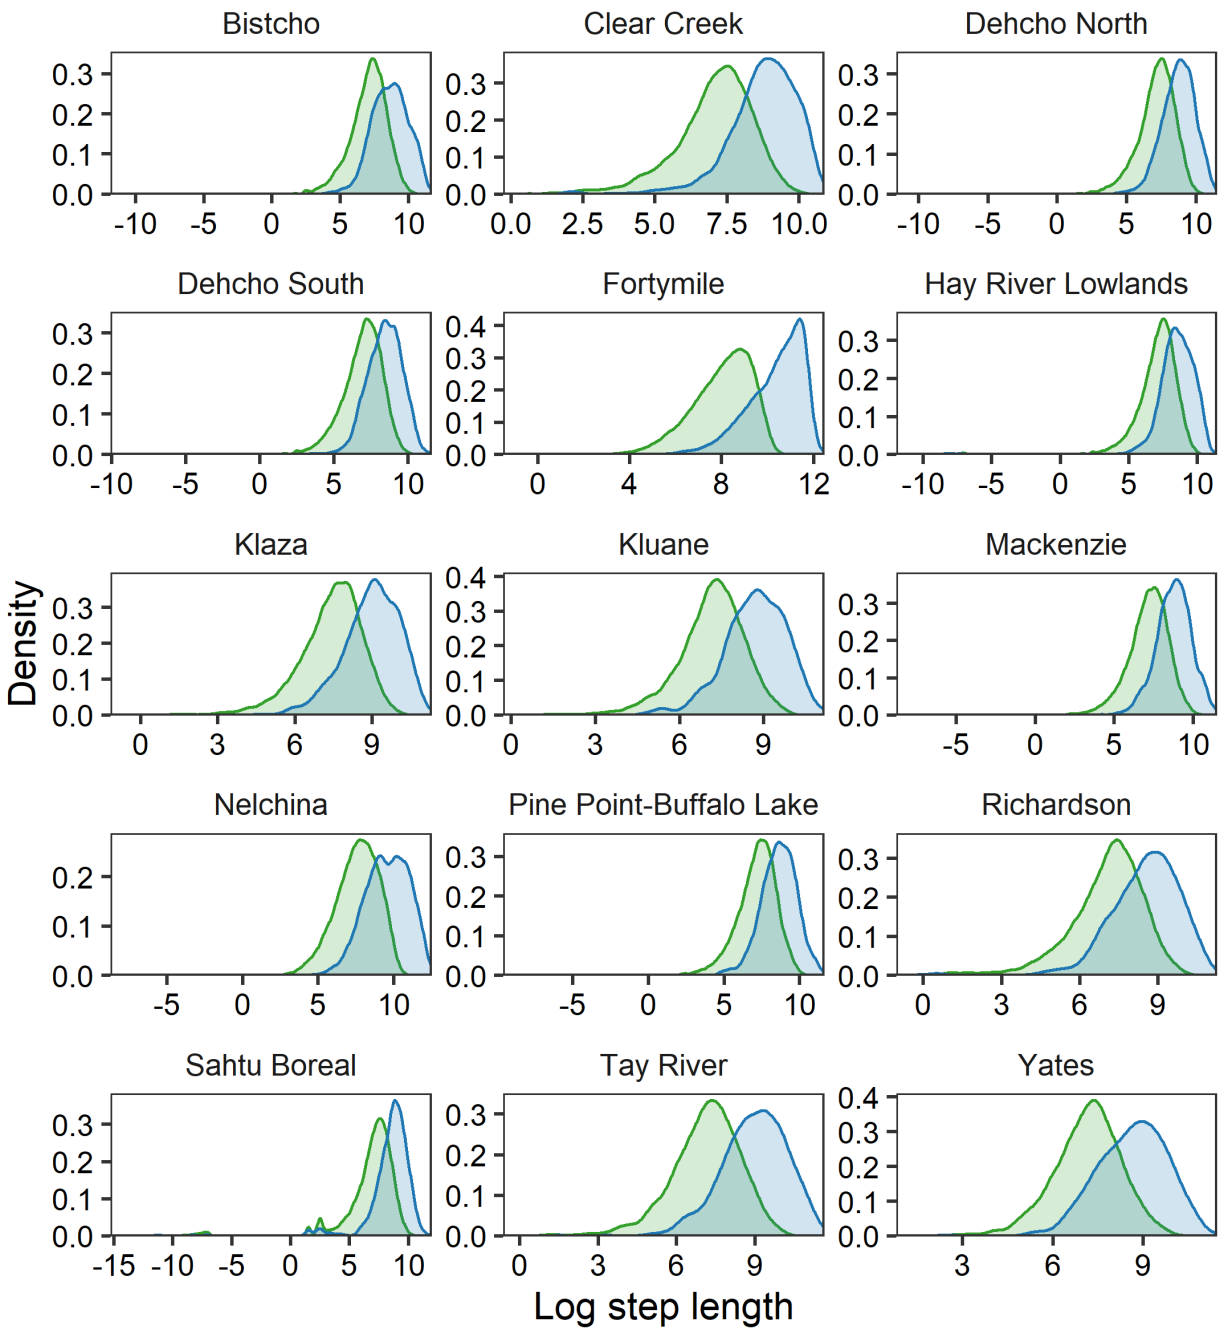

Spatiotemporal scale ■ 24 hours ■ Two weeks

Fig. S2. Distribution of step lengths for female caribou in eastern Alaska and western Yukon shown by population and spatiotemporal scale.

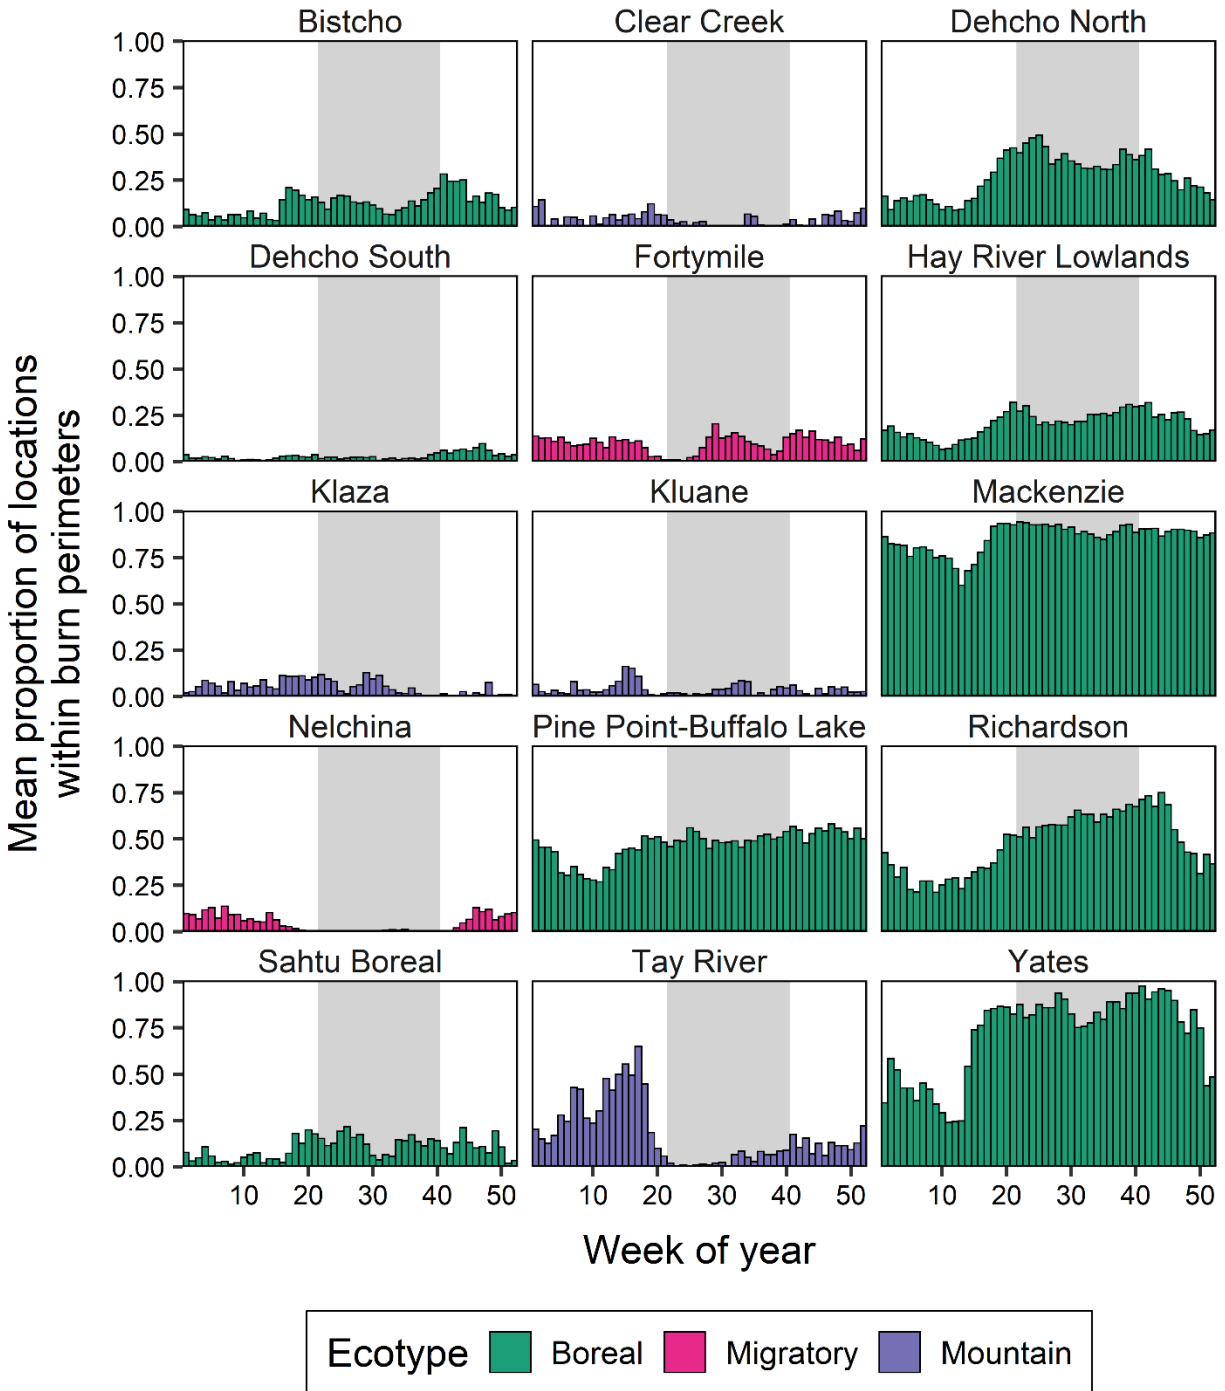

Fig. S3. Proportion of GPS locations within burn perimeters by week of year for female caribou (*Rangifer tarandus*), averaged across all individuals within a population, from 15 populations in eastern Alaska and northwest Canada. Gray shaded areas depict summer season used for models.

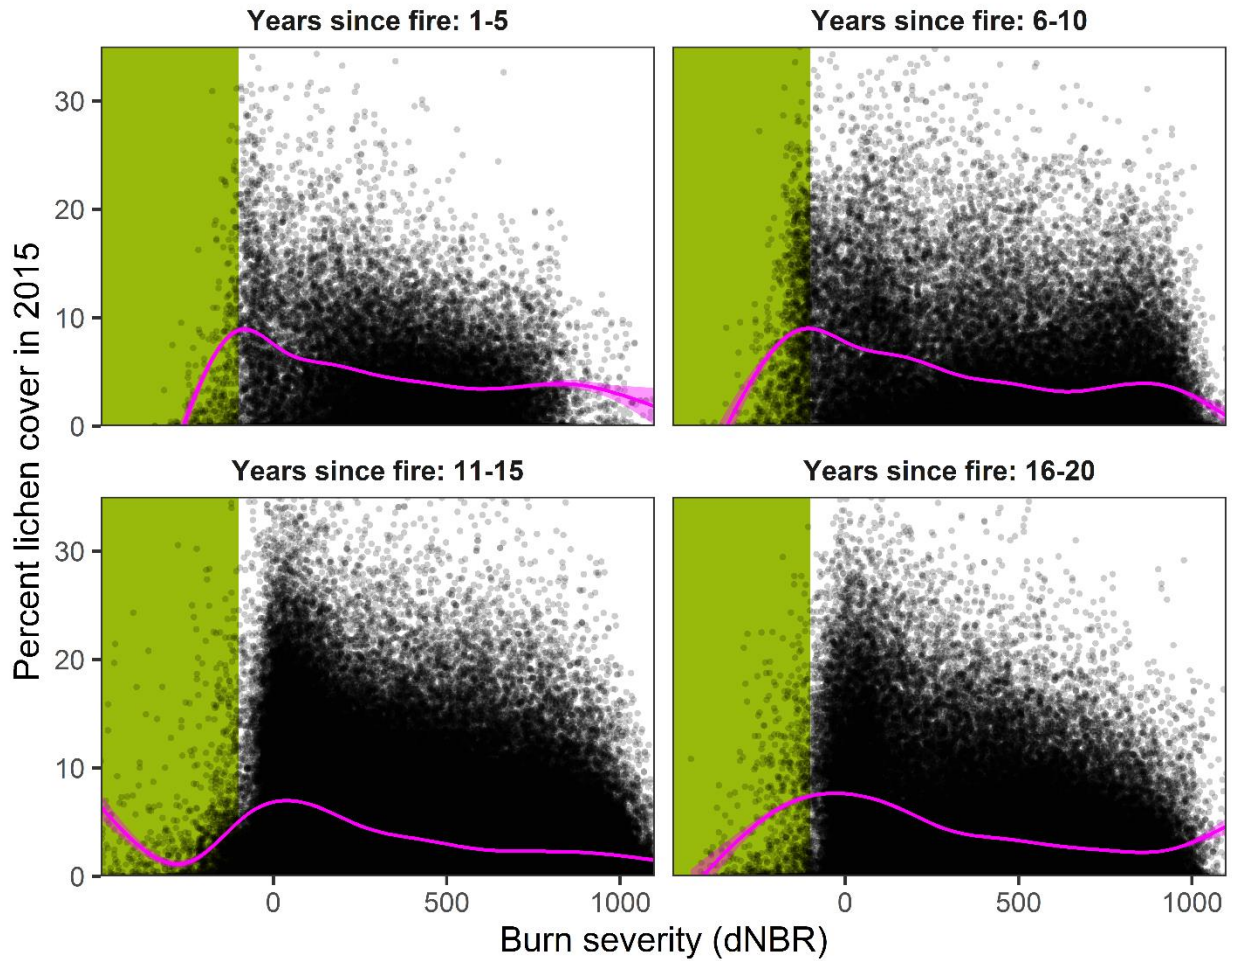

Fig. S4. Relationship between percent cover of terrestrial lichens estimated for year 2015 and burn severity within burns used by female caribou (*Rangifer tarandus*) in the Fortymile, Klaza, Kluane, and Nelchina populations in eastern Alaska and western Yukon. Data are separated into separate panels by number of years before 2015 that the fire occurred. Green shaded areas correspond to dNBR values between  $-500$  and  $-100$ , which Key and Benson (2006) classified as “regrowth”. Magenta lines depict cubic spline curves fit to the data.

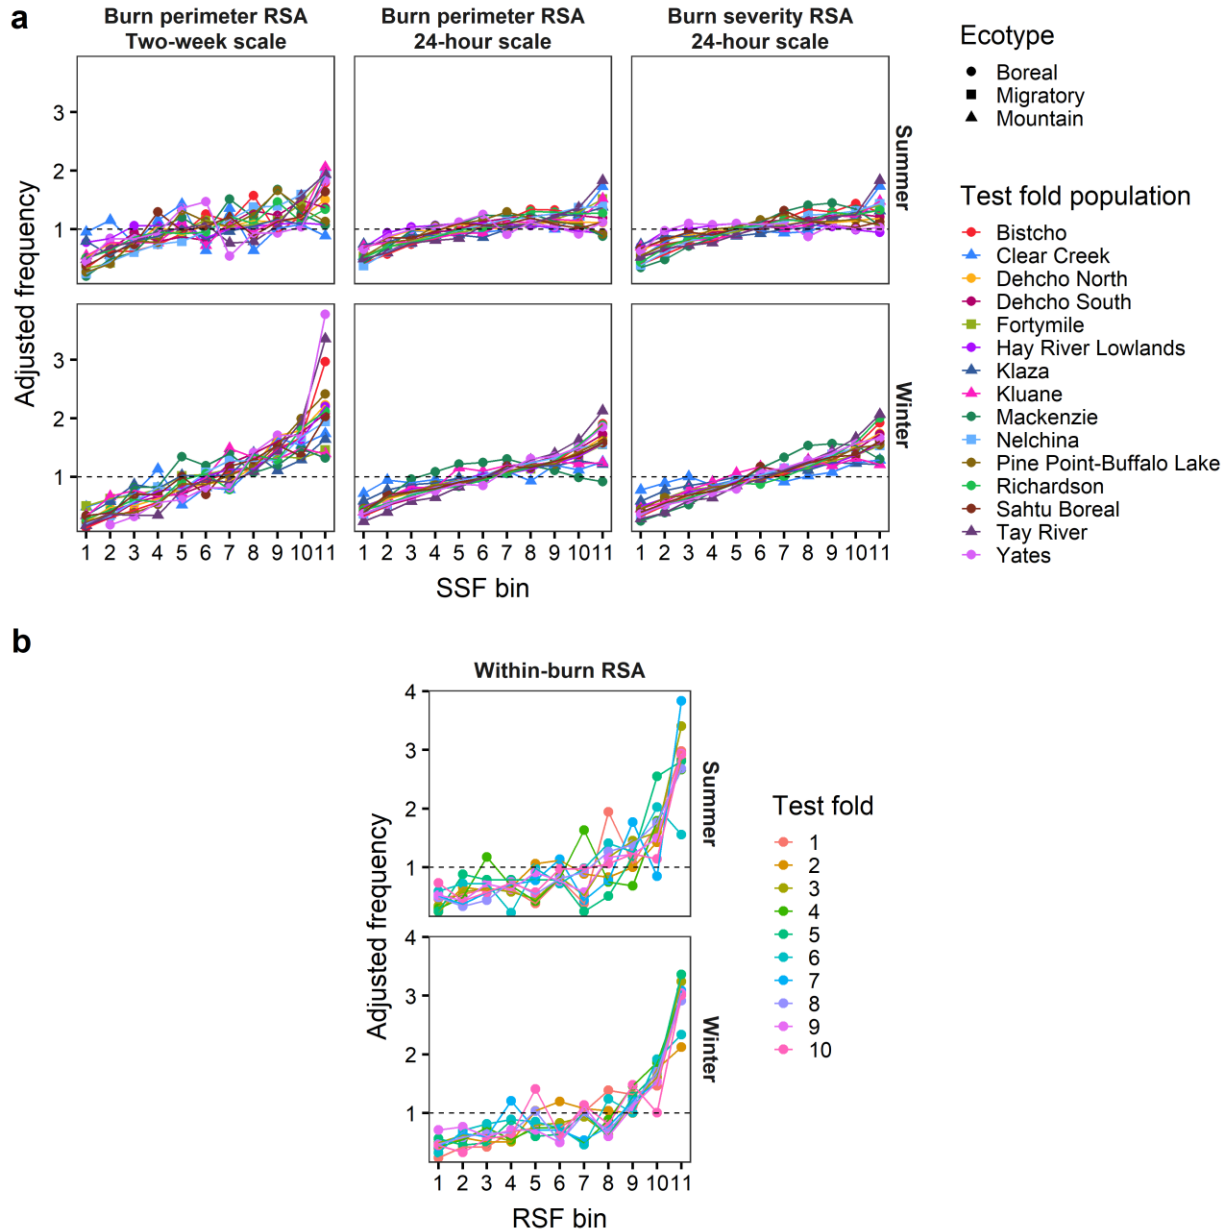

Fig. S5. Out-of-sample cross validation results from the *burn perimeter* and *burn severity RSAs* (a) and the *within-burn RSA* (b) for caribou in eastern Alaska and western Yukon. Adjusted frequencies for each test fold (or population) represent the cumulative frequency of predicted RSF scores for used locations that fall into each of 11 equal-interval bins (10 available location + 1 used location per stratum). Values above 1 indicate that cross-validated used locations occur at rates higher than expected by chance. For the *burn perimeter* and *burn severity RSAs*, models were fit using 14 of 15 populations, and model coefficients were used to predict RSF scores for the withheld population. Values for *burn perimeter RSA* are from top models with functional responses. For the *within-burn RSA*, models were fit to 90% of individual caribou, and model coefficients were used to predict RSF scores for the remaining 10% of animals.
